# Supplementary material for: A rapid and label-free platform for virus capture and identification from clinical samples
Source: PubMed Central journal article supplement (PMC6969489; doi:10.1073/pnas.1910113117), 2019-12-27
Supplement: pnas.1910113117.sapp.pdf [file pnas.1910113117.sapp.pdf]

# Supporting appendix

## A rapid and label-free platform for virus capture and identification from clinical samples

*Yin-Ting Yeh<sup>a</sup>, Kristen Gulino<sup>b</sup>, YuHe Zhang<sup>a</sup>, Aswathy Sabestien<sup>c</sup>, Tsui-Wen Chou<sup>b</sup>, Bin Zhou<sup>b</sup>,  
Zhong Lin<sup>a</sup>, Istvan Albert<sup>c</sup>, Huaguang Lu<sup>d</sup>, Venkataraman Swaminathan<sup>a</sup>, Elodie Ghedin<sup>b</sup>,  
Mauricio Terrones<sup>a</sup>*

*<sup>a</sup> Department of Physics, The Pennsylvania State University, PA 16802, USA*

*<sup>b</sup> Department of Biology, New York University, NY 10003, USA*

*<sup>c</sup> Department of Biochemistry and Molecular Biology, The Pennsylvania State University, PA 16802, USA*

*<sup>d</sup> Department of Veterinary and Biomedical Sciences, The Pennsylvania State University, PA 16802, USA*

### **Corresponding Authors:**

Yin-Ting Yeh, Ph.D.

205 Osmond

The Pennsylvania State University, University Park, PA 16802

Tel: +1-814- 303-9885

Email: [yxy155@psu.edu](mailto:yxy155@psu.edu)

Mauricio Terrones, Ph.D.

205A Osmond

The Pennsylvania State University, University Park, PA 16802

Tel: +1-814-865-0343

Email: [mut11@psu.edu](mailto:mut11@psu.edu)

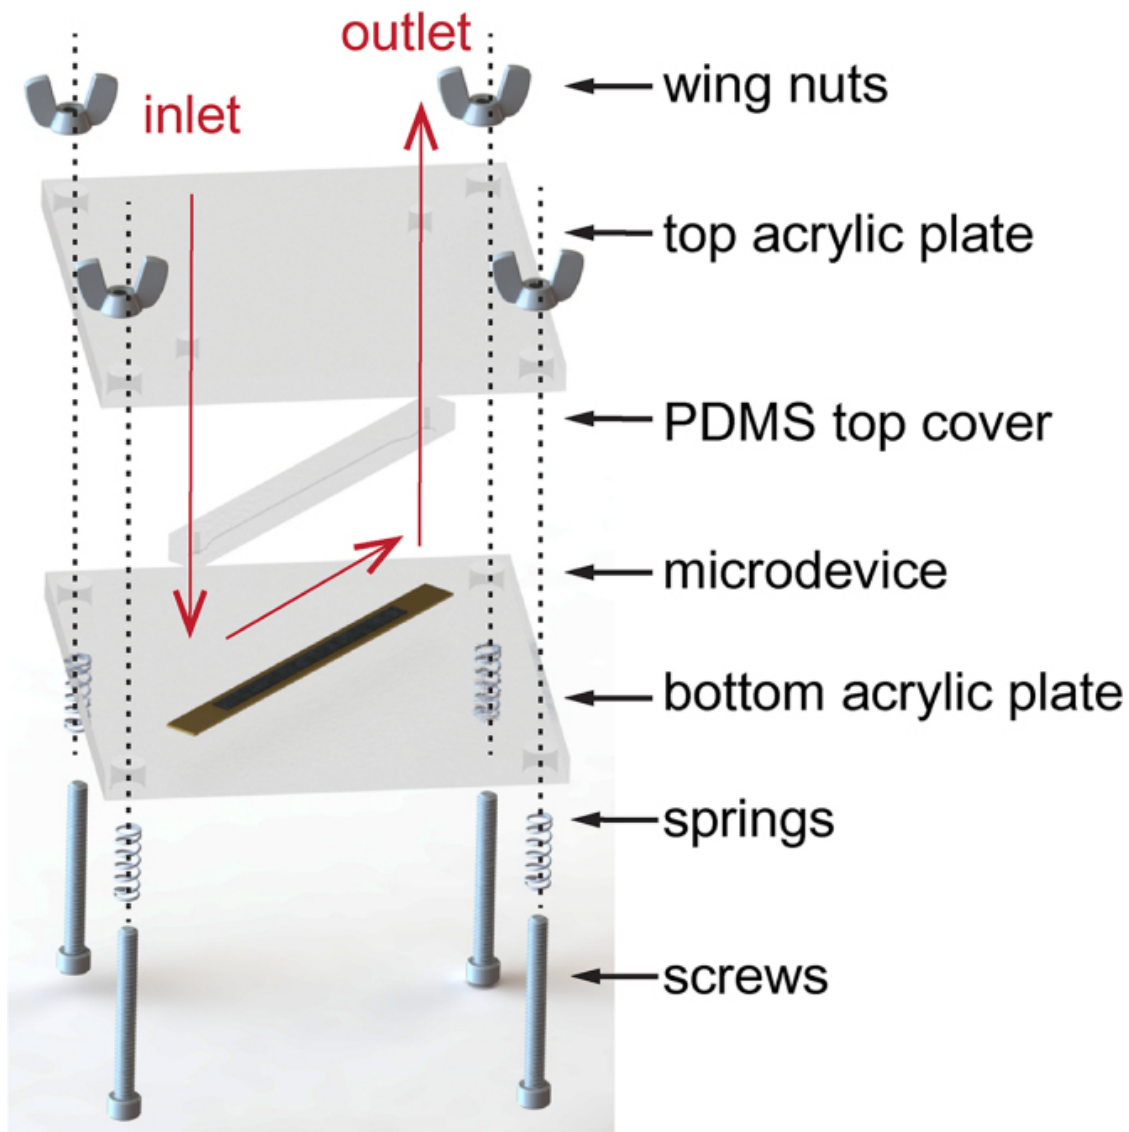

26

27 **Supplementary Figure 1.** Illustration of disassembled view of VIRRION components.

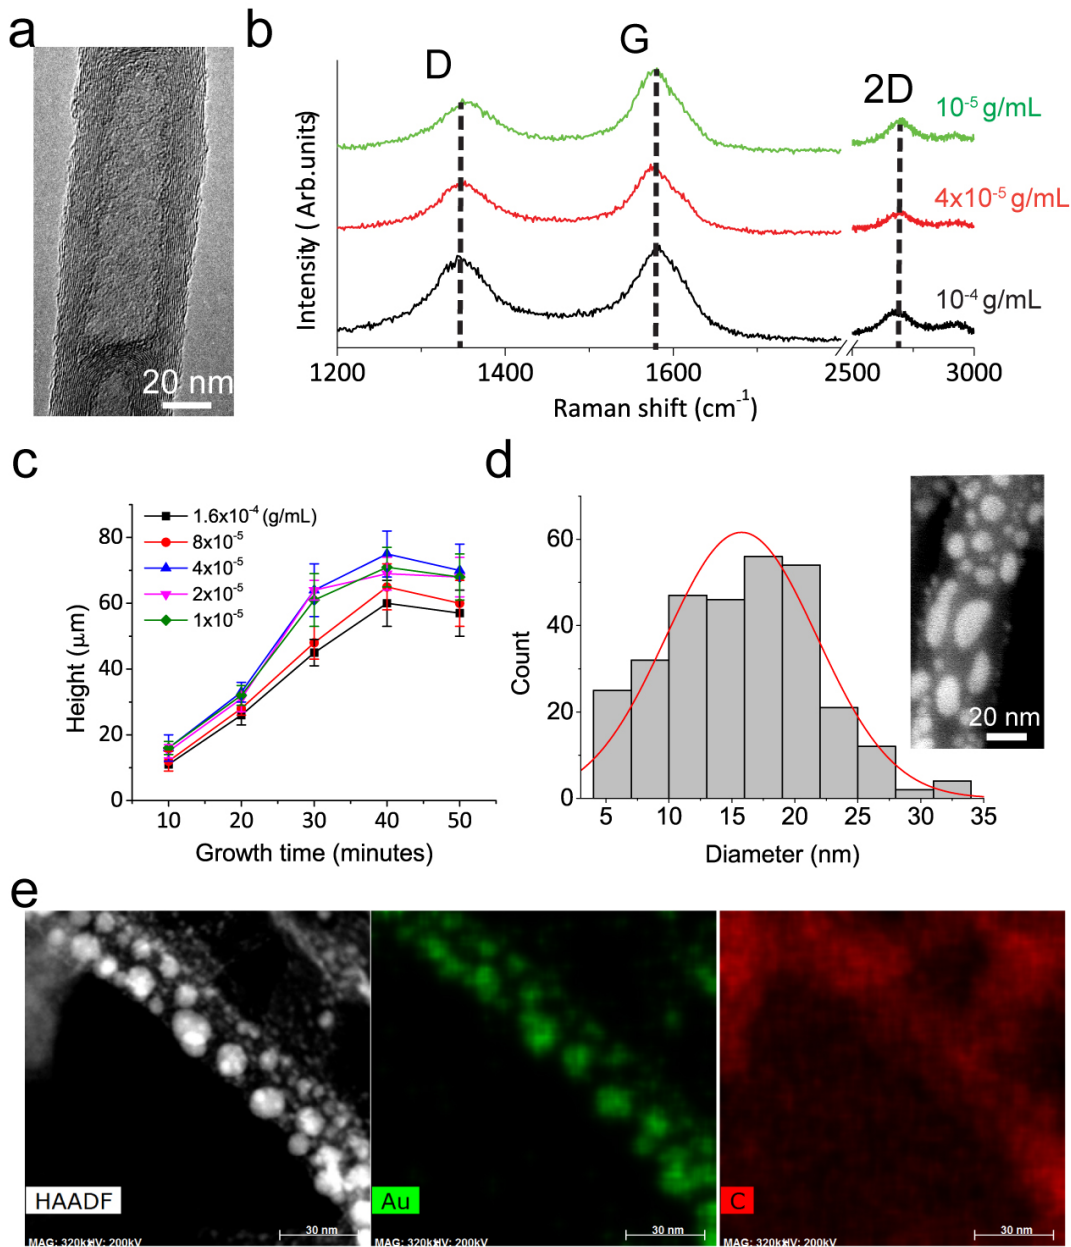

28

29 **Supplementary Figure 2.** Characterization of CNxCNTs decorated with gold nanoparticles. a)  
 30 TEM image of CNxCNT. b) Raman spectra with signature peaks of nitrogen-doped carbon  
 31 nanotube. c) Height of the aligned CNxCNTs synthesis with different concentrations of  
 32 precursors and synthesis time. d) Histogram of gold nanoparticles decorated on CNxCNT. The  
 33 average diameter of gold particles is  $15.6 \pm 6$  nm. e) TEM and Energy-dispersive X-ray  
 34 spectroscopy (EDX) of the CNxCNT decorated with gold nanoparticles.

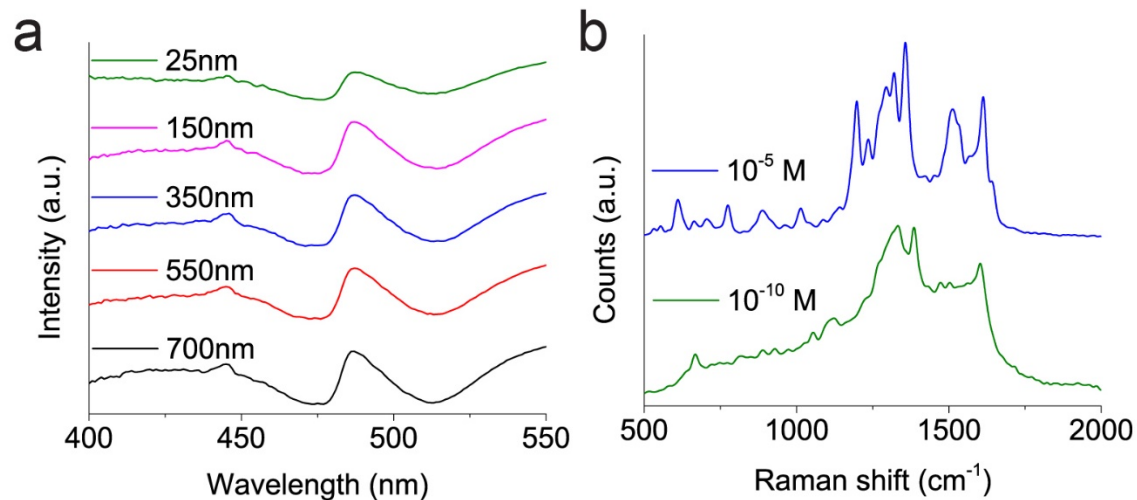

35

36 **Supplementary Figure 3.** Absorption and Raman spectroscopy of Au/CNxCNTs. a) Absorption  
37 spectra of Au/CNxCNT arrays with different ITDs measured by UV-Vis. b) Raman spectra of  
38 Rhodamine 6G measured by Au/CNxCNT arrays.

39

40

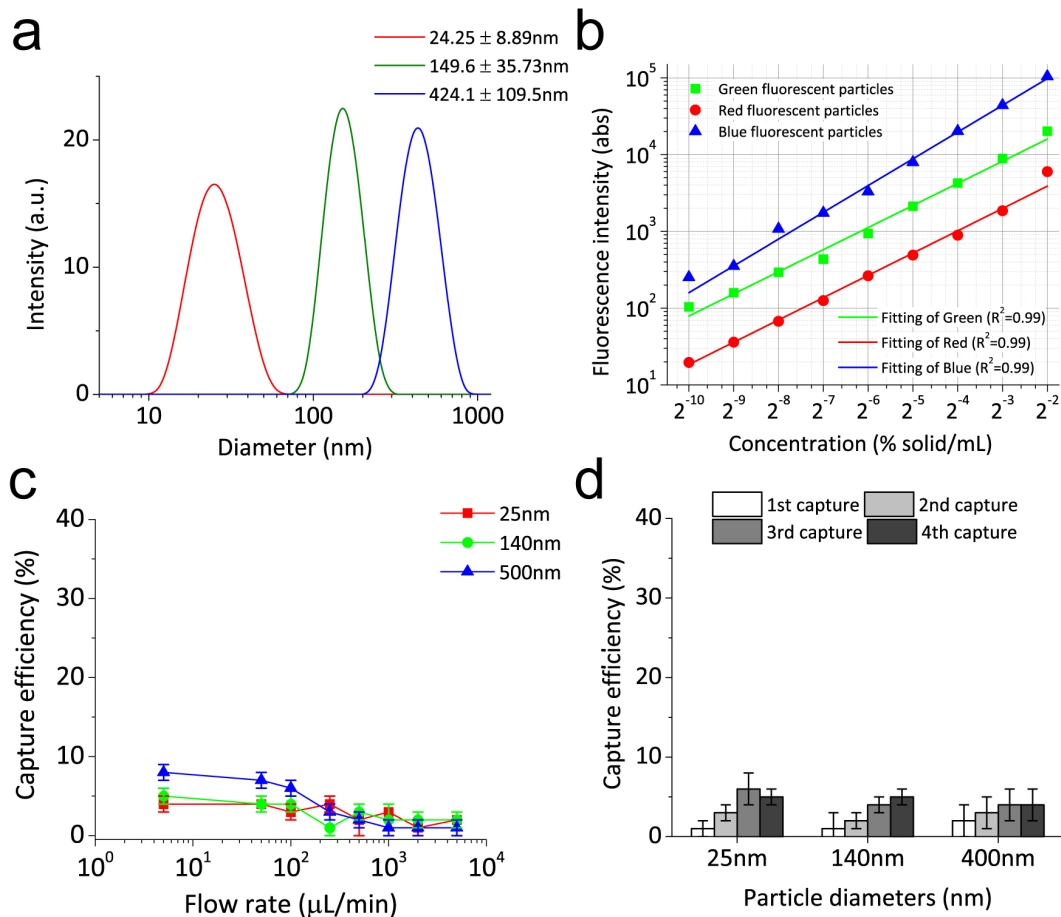

41

42 **Supplementary Figure 4.** Characterization and standard curve of fluorescently labelled particles  
 43 and capture efficiency of VIRRIION without CNxCNTs (control). a) Histogram of diameters of  
 44 fluorescent particles. b) Standard curve of fluorescence intensity as a function of particle  
 45 concentrations; abs=absorbance. c) Capture efficiency of VIRRIION without CNxCNTs (control)  
 46 under different flow rates. d) Capture efficiency of VIRRIION without CNxCNTs (control) under  
 47 250  $\mu\text{L}/\text{min}$  of repeated capture.

48

49

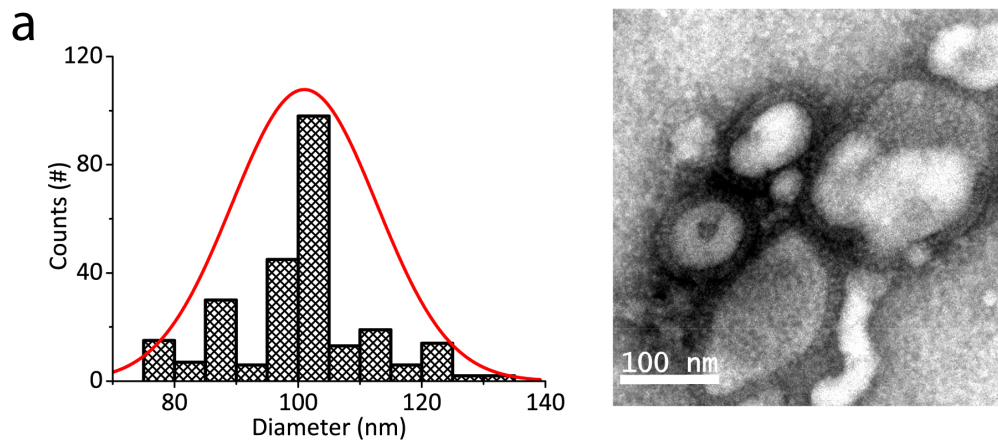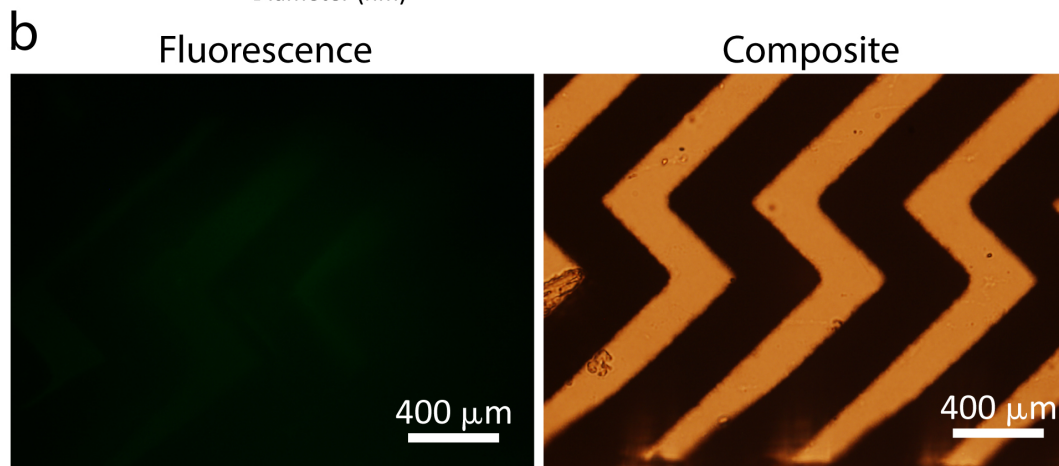

50

51 **Supplementary Figure 5.** Avian influenza virus H5N2 captured by VIRRION. a) Histogram of  
52 H5N2 diameter and TEM image of H5N2. b) Immunostaining of media without H5N2 (control).

53

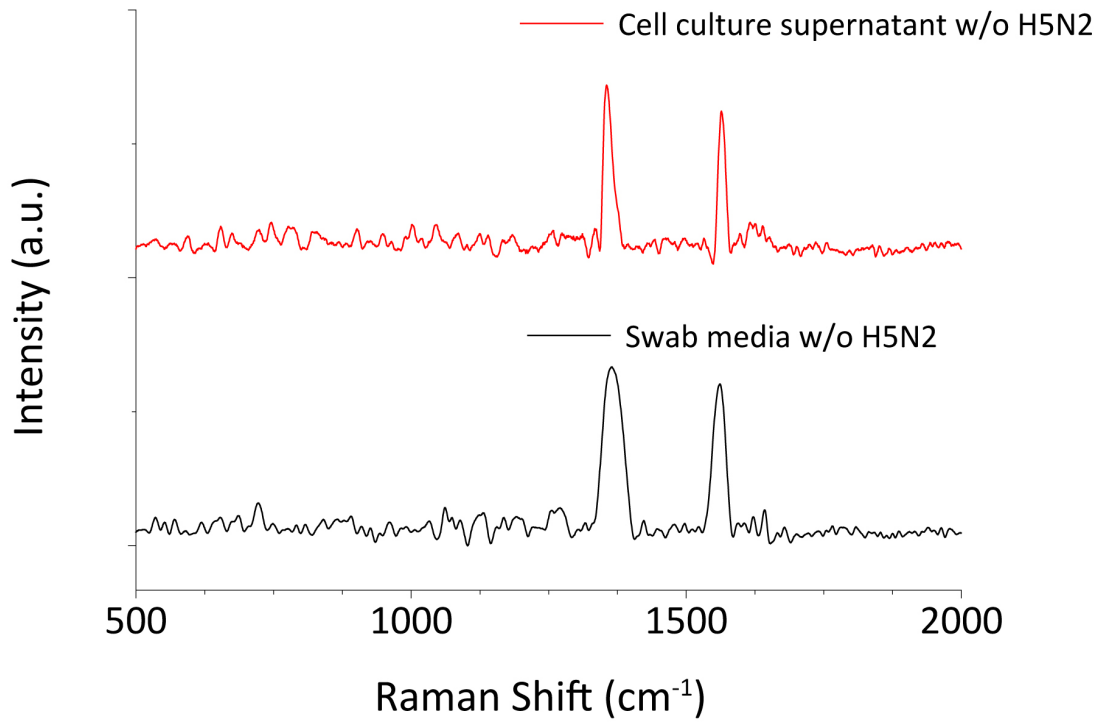

54

55 **Supplementary Figure 6.** Raman spectra of cell culture supernatant and swab media without  
56 H5N2 virus (negative control).

57

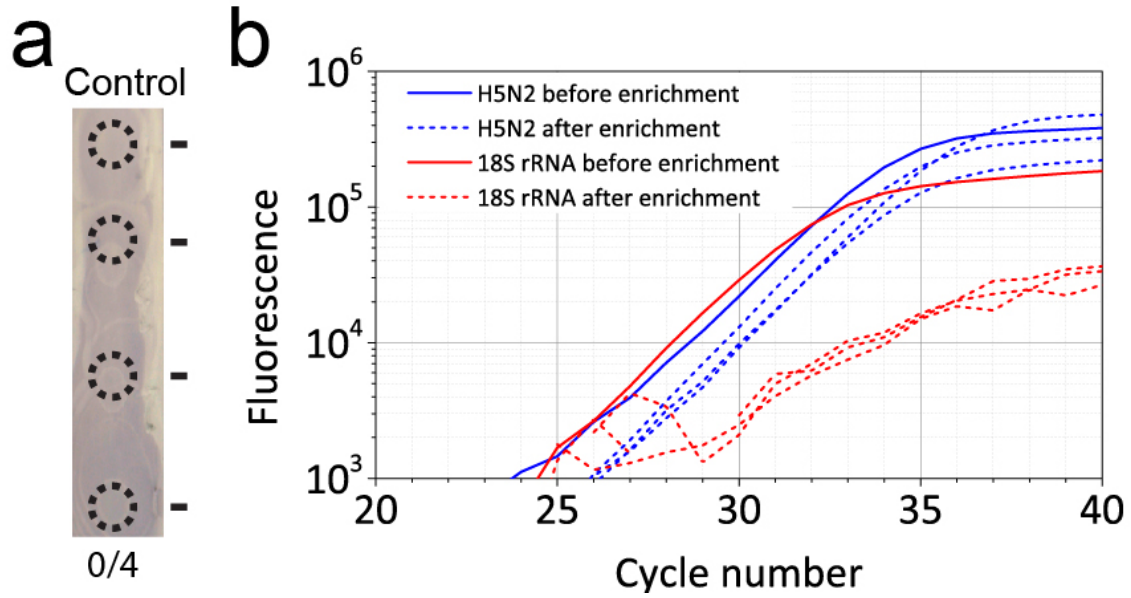

58

59 **Supplementary Figure 7.** Control experiment of viable VIRRION capture and enrichment. a)

60 Results of Dot-ELISA for CNxCNT structure without viruses through egg propagation. b) RT-

61 qPCR results of H5N2 and 18S rRNA before and after VIRRION enrichment.

62

63



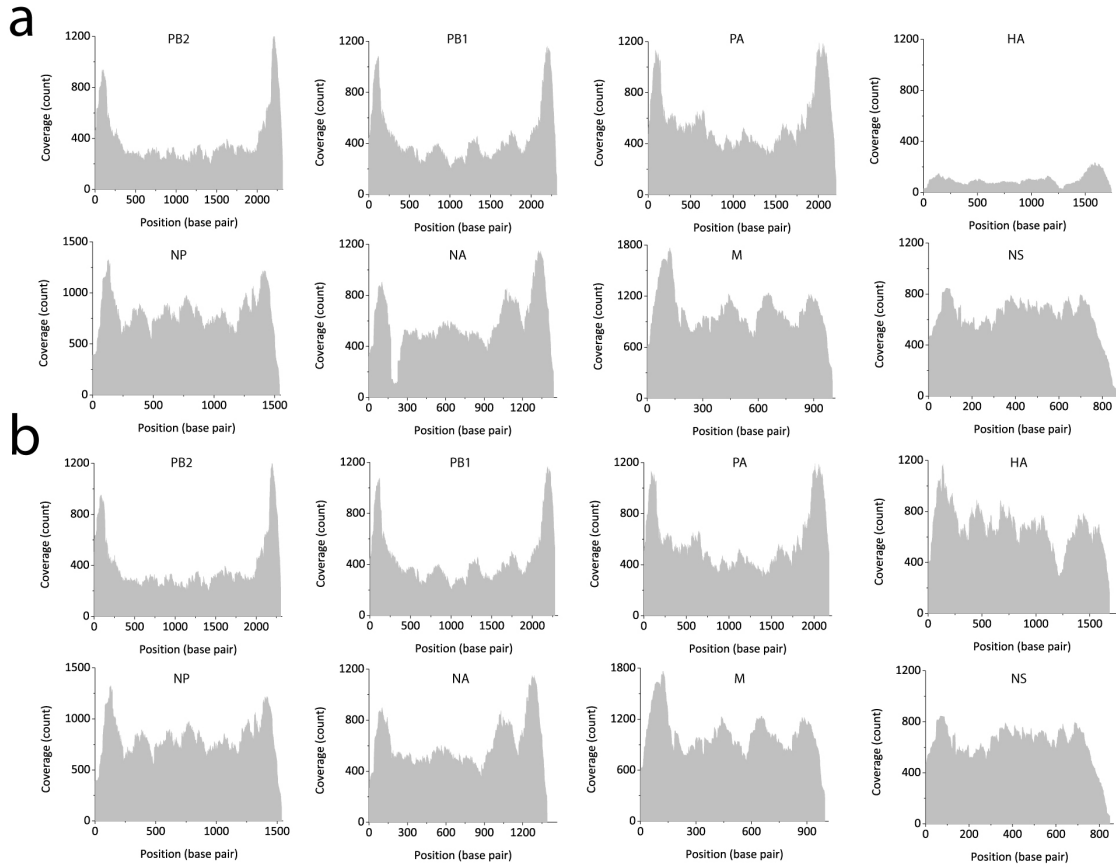

64

65 **Supplementary Figure 8.** Coverage plot of mapped avian influenza virus reads on genomic  
 66 segments after capture and enrichment by VIRRION. a) H5N2. b) H7N2. HA=hemagglutinin;  
 67 NA=neuraminidase; PB1, PB2, PA = polymerases; NP=nucleoprotein; M= matrix; NS= non-  
 68 structural protein.

69

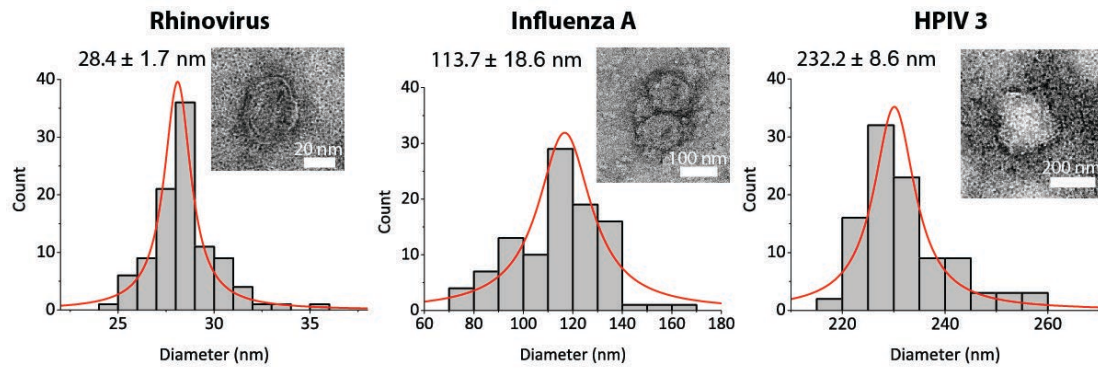

70

71 **Supplementary Figure 9.** TEM images and histograms of sizes of Human viruses. a)

72 Rhinovirus. b) influenza type A. c) parainfluenza type 3.

73

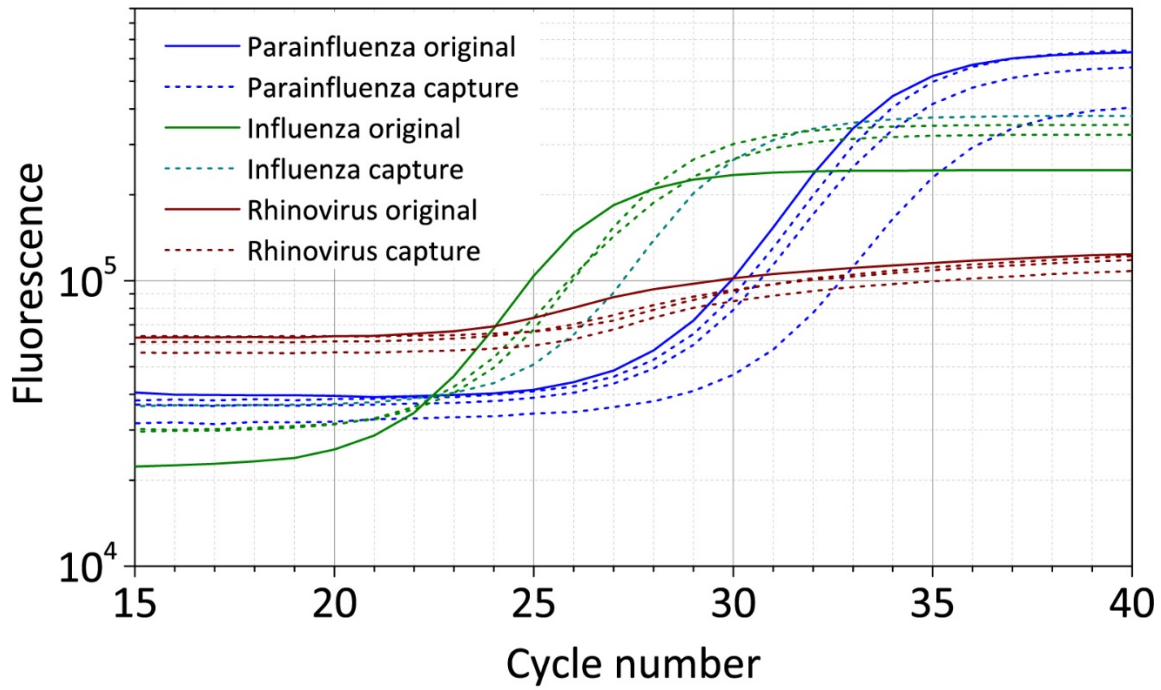

74

75 **Supplementary Figure 10.** RT-qPCR results of respiratory viruses before and after VIRRION

76 capture.

77

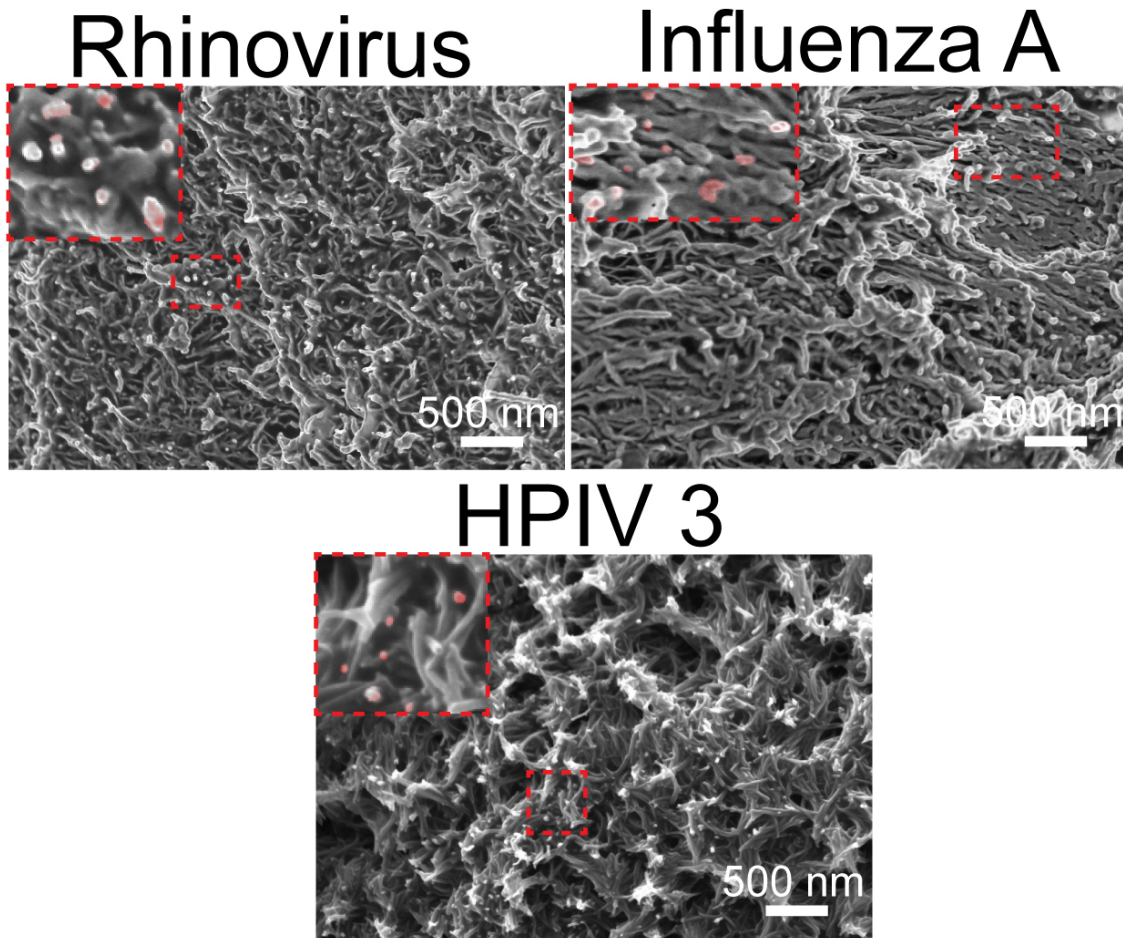

78

79 **Supplementary Figure 11.** SEM images of different respiratory virus-like particles captured by

80 VIRRION.

81

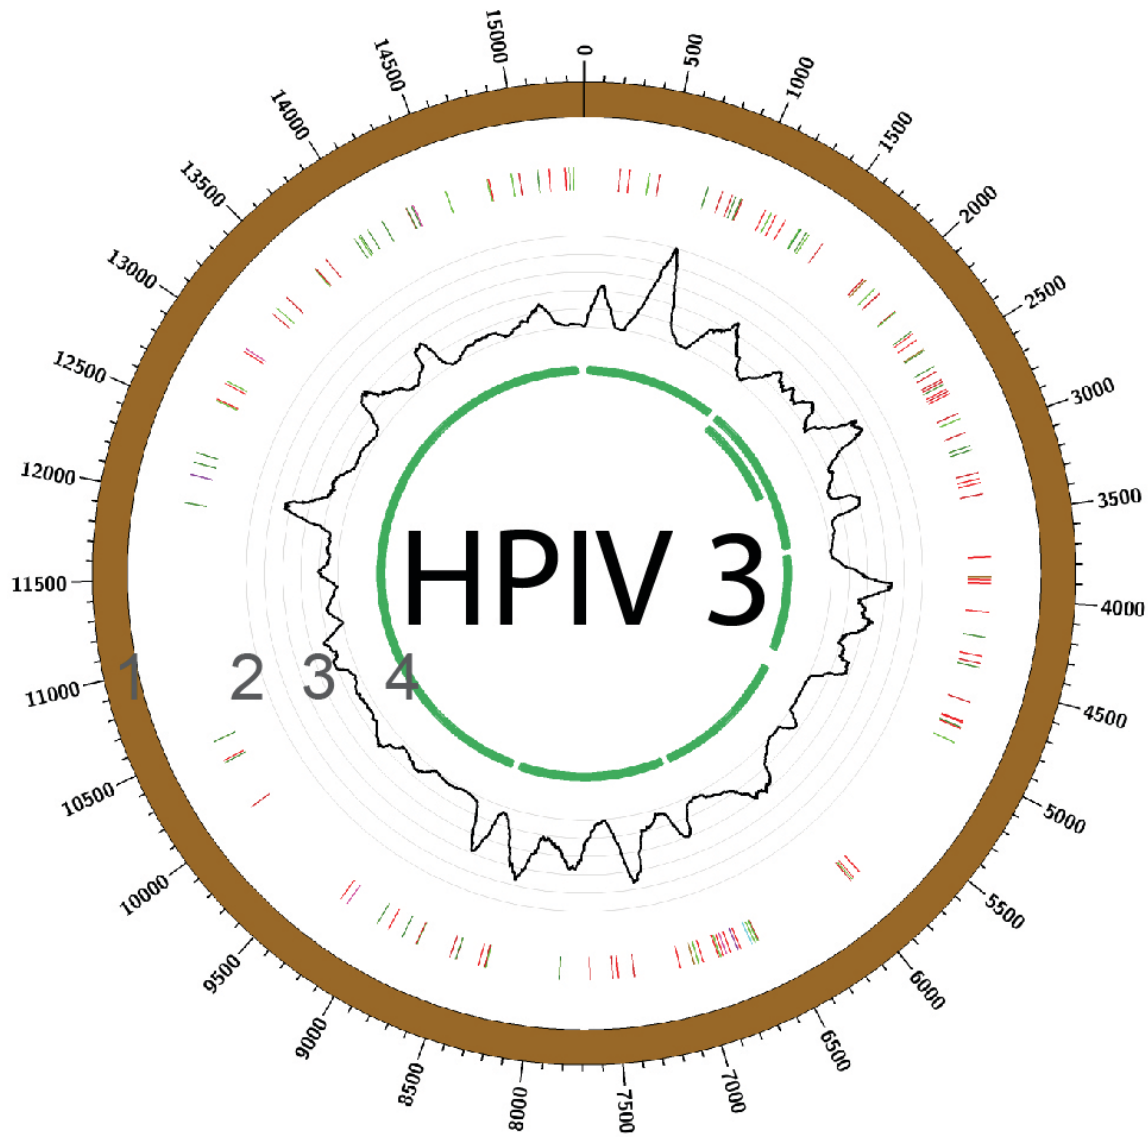

82

83 **Supplementary Figure 12.** Genomic sequencing and analysis of human parainfluenza type 3  
 84 (HPIV). track 1: scale of the nucleotide position; track 2: variant analysis by mapping to strain  
 85 #MF973163, color code: deletion (black), transition (A-G, fluorescent green; G-A, dark green;  
 86 C-T, dark red; T-C, light red), transversion (A-C, brown; C-A, purple; A-T, dark blue; T-A,  
 87 fluorescent blue; G-T, dark orange; T-G, violet; C-G, yellow; G-C, light violet).; track 3:  
 88 coverage; track 4: regions of open reading frame.

89

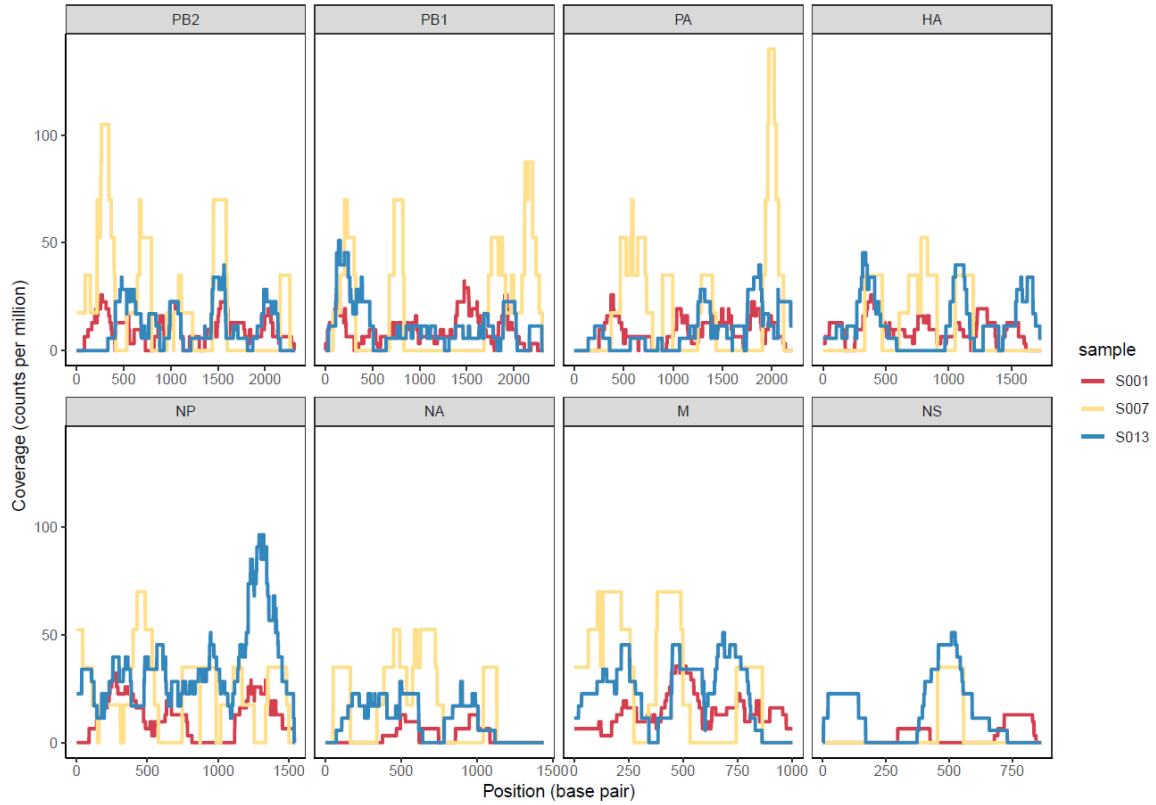

90

91 **Supplementary Figure 13.** Coverage of influenza virus segments after virus capture and  
 92 mapping of NGS reads to a reference strain (A/New York/03/2016(H3N2)). S001 represents the  
 93 sample before enrichment, S007 represents the sample after one round of enrichment, and  
 94 sample S013 represents the sample after two rounds of enrichment.

95

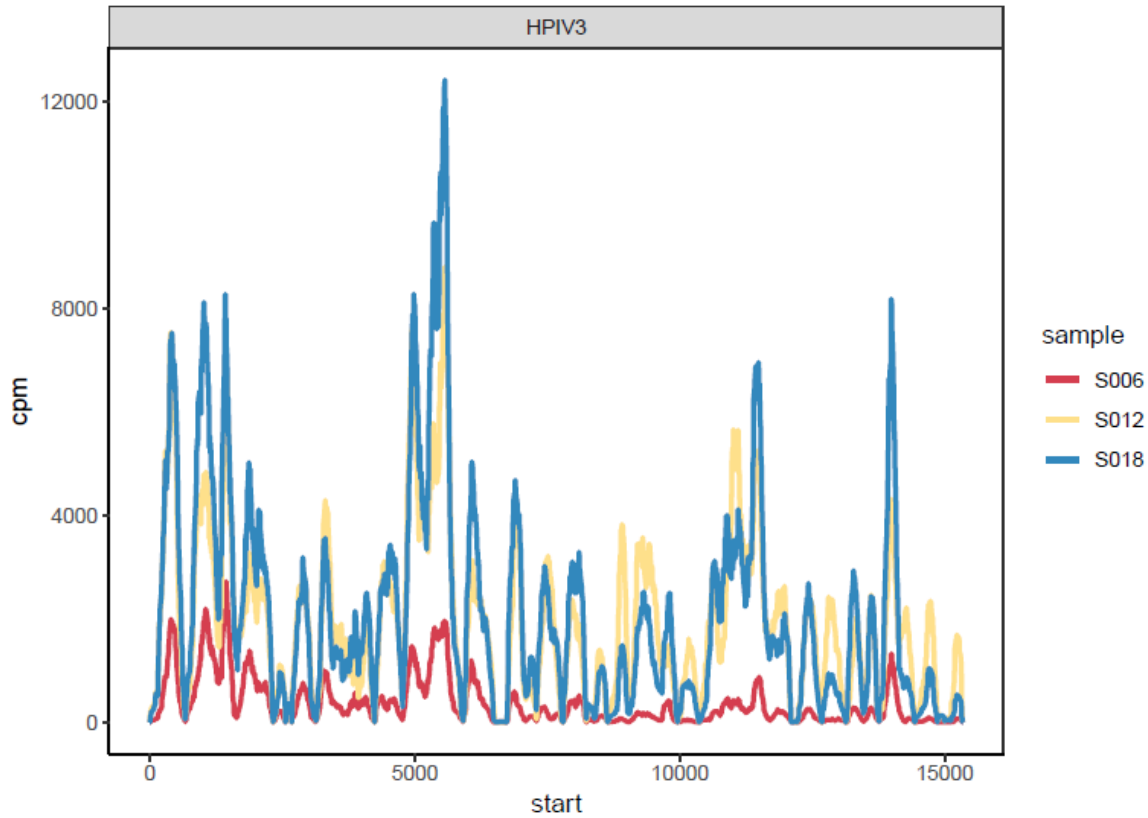

96

97 **Supplementary Figure 14.** Normalized coverage of human parainfluenza type 3 genome after  
98 virus capture and mapping of NGS reads to reference strain MF973163. S006 is the unenriched  
99 sample, S012 is the sample following one enrichment step, and S018 is the sample following two  
100 enrichment steps.

101

102

103

104

105  
106  
107  
108  
109  
110  
111  
112  
113  
114  
115  
116  
117  
118  
119  
120

### Supplementary Note 1

Principal component analysis (PCA) is a statistical technique that reduces the dimension of a dataset to visualize data set with higher dimensions (41). Specifically, PCA finds a new coordinate system so that the projected data on the first coordinate (called the first principal component) shows the most significant variance of the data, and projection on the second coordinate shows the second most significant variance, and so on. Each spectrum of our Raman data contains 1932 data points and is treated as a 1932-dimensional vector. In order to visualize the spectra of different viruses to see if the Raman spectra can capture the differences and variances, we use PCA to reduce the dimension of the spectra data. We first standardize the spectra data so that the mean value equal to zero and standard deviation equal to one in each dimension. We then apply PCA to project each spectrum on the first and second principal components. The first two principal components explain more than 90% of the variance in the whole dataset. In this way, each spectrum is represented by a point on a 2D coordinate system. Given all the 2D data points of one type of virus, we remove the outliers with a fraction of 0.2 using a standard method called Elliptic Envelope. Figure 4.d plots all the inliers of the 2D points which clearly shows the differences and variations between samples from different viruses.



## Supplementary Note 2

121  
122 Through PCA, we visualize the dimension-reduced Raman spectra data points on a 2D  
123 plot, which indicates that data points from different viruses are clearly separable. Next, we apply  
124 machine learning (ML) methods to classify the Raman spectra generated by different virus  
125 samples. It is a typical classification problem, for which the input is a Raman spectrum and the  
126 output is a virus category. The most common ML algorithm for such classification problems  
127 includes Logistics Regression (43), Support Vector Machine (42), Decision Tree (44) and  
128 ensemble methods of Decision Tree, such as Random Forest (45). We test these four methods on  
129 our dataset with 3-fold cross-validation: first split the whole dataset into 3 groups evenly; then, for  
130 each group, hold it as a validation set and train the model on the remaining data; finally evaluate  
131 the accuracy of the trained model on the validation set. The average accuracy on the hold-out  
132 validation set is used to select the best model. We find the Logistic Regression produces the highest  
133 mean validation accuracy (~90%), where Support Vector Machine (~78%), Decision Tree (~70%)  
134 and ensemble methods of Decision Tree (~83%) on respiratory virus samples. We also tested if  
135 preprocessing the data by standardization, the same preprocessing used in PCA, improves the  
136 accuracy. We found that the results almost remain the same for Logistic Regression, so no  
137 preprocessing is needed.

138

### 139 **Materials and Methods**

#### 140 **Patterning and growth of the CNxCNT**

141 A mold with a pattern for stamping was designed by Solidwork (v2018) and manufactured  
142 by a 3D printer (Flashforge Creator Pro) using polylactide (PLA) as a building material. We coated  
143 molds with uncured polydimethylsiloxane (PDMS) and cured overnight for PDMS crosslinking.  
144 Then, 100  $\mu$ L of the precursor solution was spun on a silicon substrate (2cm by 2cm) with 300 nm  
145 thick oxide layer under 500 rpm for 5 seconds and followed by 1000 rpm for 30 seconds. Before  
146 stamping, both PDMS-coated stamps and glass substrates were treated by a mild air plasma. The  
147 growth and the characterization of the CNxCNTs were described in our previous report (29). After  
148 CVD growth, gold was deposited on the CNxCNT array by using sputter (Kurt J. Lesker Lab-18)  
149 and followed by annealing at 400°C for 10 minutes. Image analysis was performed using a field  
150 emission SEM (LEO 1530 FESEM) to measure dimensions through cross-sectional images.

151 **The efficiency of size-based capture**

152 Fluorescently labeled particles were purchased from Thermo Fisher Scientific (Fluoro-  
153 Max Dyed Aqueous Fluorescent Particles) and diluted with DI water. Fluorescence intensity was  
154 measured by a microplate reader (Tecan Infinite F200). Capture efficiency was calculated by  
155 comparing the fluorescence intensity of the original sample to the flow-through samples using  
156 standard curves (Sup. Fig.4).

157 **Raman spectroscopy**

158 Rhodamine 6G (Sigma Aldrich, Cat# 252433) was diluted with ethanol and then applied  
159 to the Au/CNxCNT substrate. A substrate was immersed in R6G solution for 5 minutes and then  
160 rinsed by pure ethanol solution. For virus samples, VIRRION was disassembled and measured by  
161 Raman spectroscopy. Raman spectra were recorded by Raman microscopy (Renishaw, InVia  
162 Raman microscopy) using 488 nm or 785 nm lasers for 30 seconds under 50X magnification with  
163 10  $\mu$ W of the laser power.

164 **Virus sample preparation**

165 We used a low pathogenic AIV (LPAIV) subtype H5N2 and H7N2, and spiked it into viral  
166 transport media (BD, #220531) to mimic a swab sample. The avian virus was propagated in  
167 specific pathogen-free (SPF) embryonated chicken eggs (ECE) via allantoic cavity route  
168 inoculation at 9-11 days of age. The inoculated eggs were placed in a 37°C egg incubator for 72  
169 hours. The eggs were then removed from the incubator and chilled at 4 °C for 4 hr. Each egg was  
170 cracked open at the top air sac and the shell peeled without breaking the air sac membrane, and  
171 allantoic fluid containing the virus was harvested using a 3 mL sterile syringe with a 25G×5/8”  
172 needle. The harvested allantoic fluid was clarified by centrifugation at 8000 rpm for 5 minutes.  
173 The virus titers were measured in embryo infectious doses 50% (EID<sub>50</sub>) by the Reed-Muench  
174 method. Briefly, the EID<sub>50</sub> test was conducted in ECE. The propagated fresh stock H5N2 AIV was  
175 prepared in 10-fold serial dilutions from 10<sup>1</sup> through 10<sup>9</sup>. Each dilution was inoculated into 5 eggs,  
176 0.1 mL per egg. The inoculated eggs were incubated at 37 °C for 72 hours. After 72 hours of  
177 incubation, allantoic fluid was harvested from each egg. The infection status of each egg was  
178 determined by Dot-ELISA (27).

179 **On-Chip cell culture and virus AIV propagation**

180 After capturing AIV, VIRRIONs were disassembled and placed into petri dishes (Falcon™  
181 Standard Tissue Culture Dishes, Corning 353002) for cell culture. We then applied a chicken  
182 hepatocellular carcinoma cell line (LMH; ATCC CRL-2117) directly onto the CNxCNT arrays. A  
183 standard cell culture procedure, as instructed by the manufacture, was followed. For virus  
184 propagation after capture, viruses were embedded within the AU/CNxCNT structure and we  
185 disassembled the VIRRION. We used a pipette tip to harvest the Au/CNxCNT structure and  
186 transferred the tips to a centrifuge tube containing virus transport media (Becton Dickinson  
187 Cat#220244). We followed the virus propagation procedure previously described.

### 188 **Sample preparation for Electron microscopy**

189 For SEM sample preparation, samples were fixed with 4% paraformaldehyde and were  
190 then dehydrated with ethanol under a serial dilution from 50% to 100% (pure ethanol). For TEM,  
191 samples were dropped onto Quantifoil Copper grids treated with a mild air plasma (PELCO  
192 easiGlow™ Glow Discharge Cleaning System) and then negative staining was applied.

### 193 **On-chip immunostaining**

194 After virus capture, phosphate buffered saline (PBS) was introduced to flush out the inside  
195 of the VIRRION. We disassembled the VIRRION and applied monoclonal antibody against the  
196 H5 HA protein (100 µL of 1:1000 diluted work solution, Penn State ADL). After incubation at  
197 37°C for 40 minutes, we washed the substrate with 1 mL of PBS and applied goat anti-mouse  
198 immunoglobulin conjugated with FITC (100 µL of 1:500 work dilution, KPL). After another  
199 incubation at 37 °C for 40 minutes, we flushed the substrate with PBS to remove any non-specific  
200 binding. Fluorescence microscopic images were obtained by imaging the device directly with a  
201 fluorescence microscope (Olympus IX71).

### 202 **Respiratory samples**

203 Nasopharyngeal swabs collected and stored as part of a separate IRB-approved study at the  
204 Hershey Medical Center (PA, USA) of patients with respiratory infections were provided for  
205 VIRRION analysis. Three samples were available from patients diagnosed with Influenza A virus,  
206 HPIV-3, or Rhinovirus. The nasopharyngeal swabs were collected using the BD swab collection  
207 kit (BD, # 220527) and stored in a -80°C refrigerator prior to use. The storage media is what was  
208 used on the VIRRION, without dilution or pre-processing.

## 209 **Viral nuclei acid extraction and quantitative PCR detection**

210 After virus capture, we applied 300  $\mu$ L lysis solution (Qiagen, QIAamp MinElute Virus  
211 Spin Kit) into the microdevice and collected supernatants. The viral RNA was extracted with  
212 QIAamp MinElute Virus Spin Kit (Qiagen) following the manufacturer's protocol. RT-qPCR  
213 detection was performed with a real-time PCR system (Applied Biosystem Inc. 7300) using thr  
214 QIAGEN OneStep RT-PCR Kit (Cat# 210212). The primers used for for RT-qPCR were for  
215 influenza A (52): AAAGCGAATTTTCAGTGTGAT (sense), GAAGGCAATGGTGAGATTT  
216 (antisense); influenza B (52): GTCCATCAAGCTCCAGTTTT (sense),  
217 TCTTCTTACAGCTTGCTTGC (antisense), RSV(52): TTTCCACAATATYTAAGTGTCAA  
218 (sense), TCATCWCCATACTTTTCTGTTA (antisense); HPIV 2 (52):  
219 CCATTTACCTAAGTGATGGAA (sense), CGTGGCATAATCTTCTTTTT (antisense); HPIV  
220 3(52): GGAGCATTGTGTCATCTGTC (sense), TAGTGTGTAATGCAGCTCGT (antisense);  
221 and Rhinovirus (53): GGGTGYGAAGAGYCTANTGTGCT (sense),  
222 GGACACCCAAAGTAGTYGGTYC (antisense)

## 223 **NGS sample preparation and analysis**

224 Total RNA of the samples was extracted and reverse transcribed into cDNA by TruSeq  
225 Stranded Total RNA Sample Prep Kit (Illumina, San Diego, CA). We followed the manufacturer's  
226 instruction but skipped poly-A enrichment. The quality of the cDNA library was characterized by  
227 the Agilent Bioanalyzer system (Agilent Technologies, Santa Clara, CA, USA). Library  
228 concentration was assessed by qPCR using the KAPA Library Quantification Kit Illumina  
229 Platforms (Kapa Biosystems, Wilmington, MA, USA). Finally, the prepared cDNA libraries were  
230 loaded into different lanes of the MiSeq sequencer using 150 nt single read sequencing (Illumina,  
231 San Diego, CA, USA).

## 232 **Sequencing analysis**

233 We removed the adaptors and performed quality trimming using Trimmomatic (54). We used  
234 DeconSeq (55) to remove reads that matched to the human reference genome. The remaining reads  
235 were mapped to reference strains using Bowtie2 (56). LASTZ and SAMtools (57, 58) were used  
236 to identify and obtain the final virus consensus sequences. Intrahost variants (iSNVs) were  
237 identified using a haplotype-based variant detector (Freebayes) with a setting of ploidy of 1 and  
238 error rate of 1% for Illumine MiSeq. If the frequency of the variant population was higher than

239 1%, it was considered an iSNV site. The genetic variants were annotated by SnpEff v4.1. The NGS  
240 data was displayed by generating plots with Circos (v 0.67). Read coverage was analyzed by  
241 mapping reads to reference strains using Bowtie2. To normalize between library sizes, counts per  
242 million were calculated. Genome assembly was performed *de novo* using metaSpades (59) and  
243 contigs > 500 bp were retained for analysis. These contigs were assigned taxonomy by using blastn  
244 and the NCBI nt database. They were further confirmed using the viral RefSeq database provided  
245 by NCBI.

246 Data Availability Statement: All data discussed in the paper will be made available to readers. All  
247 the raw NGS data were upload to Sequence Read Archive (SRA) at NCBI under submission  
248 number SUB5200307.

249
